# Supplementary material for: Nitrogen functional groups on an activated carbon surface to effect the ruthenium catalysts in acetylene hydrochlorination
Source: Royal Society of Chemistry journal article supplement (doi:10.1039/c5ra18851b), 2015-01-01
Supplement: c5ra18851b1.pdf [file c5ra18851b1.pdf]

**-Supporting Information-**

**Effect of nitrogen functional groups on activated carbon surface and ruthenium catalysts on acetylene hydrochlorination**

Na Xu<sup>a</sup>, Mingyuan Zhu\*<sup>a, b</sup>, Jinli Zhang\*<sup>a, c</sup>, Haiyang Zhang<sup>a, b</sup>, Bin Dai<sup>a, b</sup>

<sup>a</sup>School of Chemistry and Chemical Engineering of Shihezi University, Shihezi,

Xinjiang, 832000, PR China.

<sup>b</sup>Key Laboratory for Green Processing of Chemical Engineering of Xinjiang

Bingtuan, Shihezi, Xinjiang, 832000, PR China.

<sup>c</sup>School of Chemical Engineering and Technology, Tianjin University, Tianjin,

300072, PR China.

\*Corresponding author. Tel.: +86-993-2057270; Fax: +86-993-2057210.

E-mail address: [zhuminyuan@shzu.edu.cn](mailto:zhuminyuan@shzu.edu.cn) (M. Zhu)

\*Corresponding author. Tel.: +86-22-27890643; Fax: + 86-22-27890643.

E-mail address: [zhangjinli@tju.edu.cn](mailto:zhangjinli@tju.edu.cn) (J. Zhang)

**Fig. S1** TGA curves of the fresh and used catalysts.

**Fig. S2** Ru 3p<sub>3/2</sub> XPS spectra of fresh catalysts: (a) Ru/AC, (b) Ru/AC-NO<sub>2</sub>, (c) Ru/AC-NH<sub>2</sub>, and (d) Ru/AC-NH.

**Fig. S3** Ru 3p<sub>3/2</sub> XPS spectra of used catalysts: (a) Ru/AC, (b) Ru/AC-NO<sub>2</sub>, (c) Ru/AC-NH<sub>2</sub>, and (d) Ru/AC-NH.

**Table. S1** Weight loss of fresh and used catalysts under different temperature ranges.

**Table S1**

Weight loss of fresh and used catalysts under different temperature ranges.

| Catalysts                   | Temperature range (°C) |         |         |         |
|-----------------------------|------------------------|---------|---------|---------|
|                             | <150                   | 150-300 | 300-400 | 150-400 |
| Fresh Ru/AC                 | 0.8                    | 0.7     | 3.7     | 4.4     |
| Used Ru/AC                  | 0.1                    | 1.2     | 16.4    | 17.6    |
| Fresh Ru/AC-NO <sub>2</sub> | 0.8                    | 2.2     | 12.7    | 14.9    |
| Used Ru/AC-NO <sub>2</sub>  | 0.1                    | 2.0     | 19.7    | 21.7    |
| Fresh Ru/AC-NH <sub>2</sub> | 1.1                    | 1.2     | 12.9    | 14.1    |
| Used Ru/AC-NH <sub>2</sub>  | 0.04                   | 2.6     | 14.7    | 17.3    |
| Fresh Ru/AC-NHN             | 0.4                    | 0.8     | 7.3     | 8.1     |
| Used Ru/AC-NHN              | 0.1                    | 2.0     | 8.0     | 10.0    |

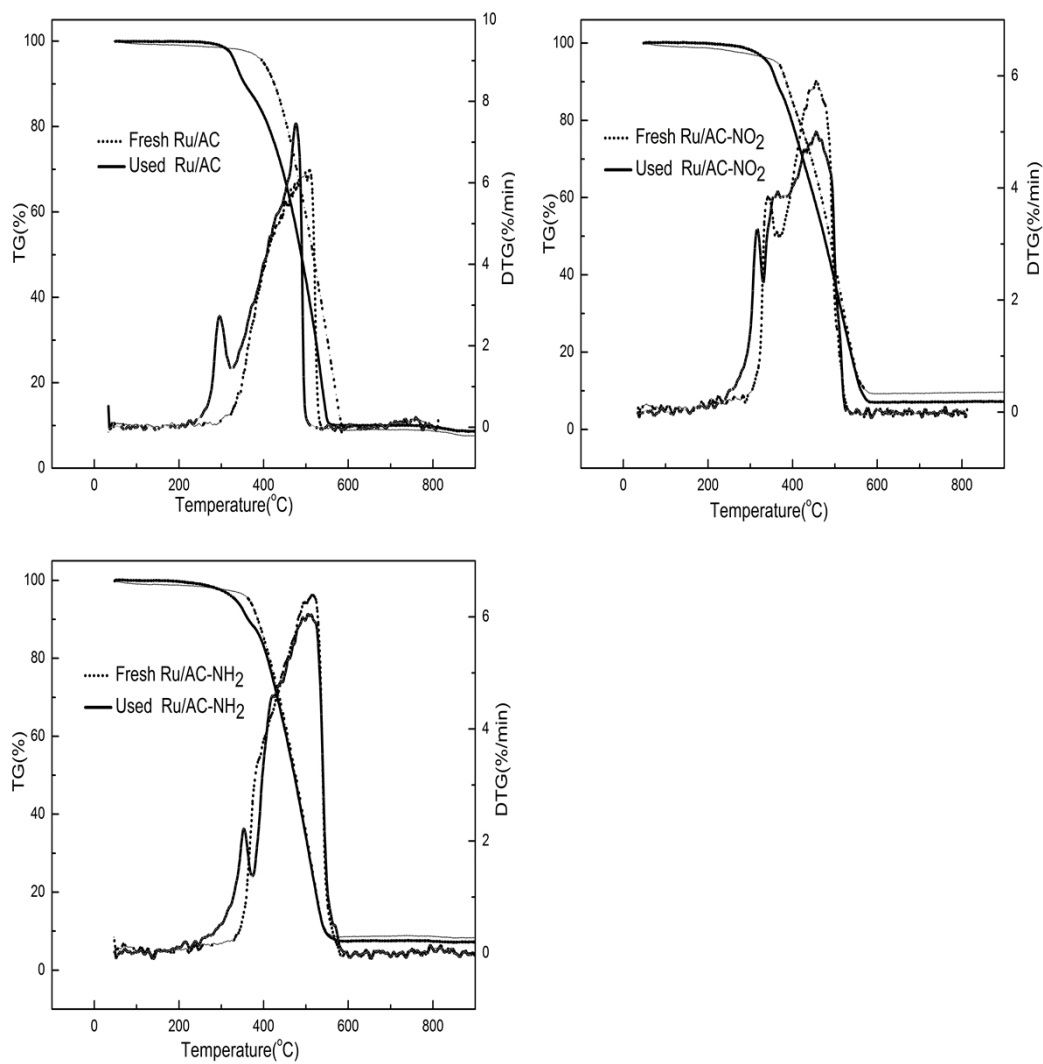

**Fig. S1** TGA curves of the fresh and used catalysts.

**Fig. S2** Ru 3p<sub>3/2</sub> XPS spectra of fresh catalysts: (a) Ru/AC, (b) Ru/AC-NO<sub>2</sub>, (c) Ru/AC-NH<sub>2</sub>, and (d) Ru/AC-NHN.

**Fig. S3** Ru 3p<sub>3/2</sub> XPS spectra of used catalysts: (a) Ru/AC, (b) Ru/AC-NO<sub>2</sub>, (c) Ru/AC-NH<sub>2</sub>, and (d) Ru/AC-NHN.
